# Supplementary material for: Craft-and-Stick Xurographic Manufacturing of Integrated Microfluidic Electrochemical Sensing Platform
Source: MDPI journal article supplement (doi:10.3390/bios13040446), 2023-03-31
Supplement: s1 [file s1]

Supplementary information

# Craft-and-stick xurographic manufacturing of integrated micro-fluidic electrochemical sensing platform

Supatinee Kongkaew<sup>1,2,3,5</sup>, Lingyin Meng<sup>1</sup>, Warakorn Limbut<sup>2,3,5,\*</sup>, Guozhen Liu<sup>7</sup>, Proespichaya Kanatharana<sup>2,3,4</sup>, Panote Thavarungkul<sup>2,3,4</sup>, Wing Cheung Mak<sup>1,6\*</sup>

<sup>1</sup> Biosensors and Bioelectronics Centre, Division of Sensor and Actuator Systems, Department of Physics, Chemistry and Biology, Linköping University, SE-581 83 Linköping, Sweden

<sup>2</sup> Center of Excellence for Trace Analysis and Biosensor, Prince of Songkla University, Hat Yai, Songkhla 90112, Thailand

<sup>3</sup> Center of Excellence for Innovation in Chemistry, Faculty of Science, Prince of Songkla University, Hat Yai, Songkhla 90112, Thailand

<sup>4</sup> Division of Health and Applied Sciences, Faculty of Science, Prince of Songkla University, Hat Yai, Songkhla 90112, Thailand

<sup>5</sup> School of Medicine, The Chinese University of Hong Kong, Shenzhen 518172, China

<sup>6</sup> Division of Physical Science, Faculty of Science, Prince of Songkla University, Hat Yai, Songkhla 90112, Thailand

<sup>7</sup> Department of Biomedical Engineering, The Chinese University of Hong Kong, Hong Kong SAR, China

\* Correspondence: warakorn.l@psu.ac.th (W.L.); wing.cheung.mak@cuhk.edu.hk (W.C.M.)

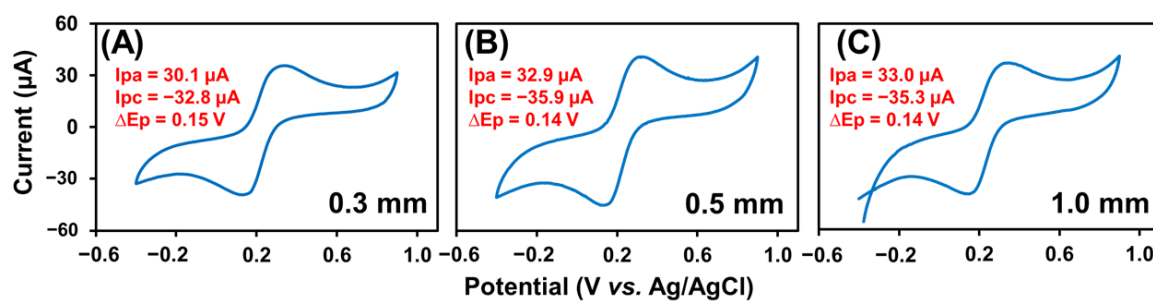

**Figure S1** Cyclic voltammograms of different track widths of GPE consisted of (A) 0.3, (B) 0.5, and (C) 1.0 mm.

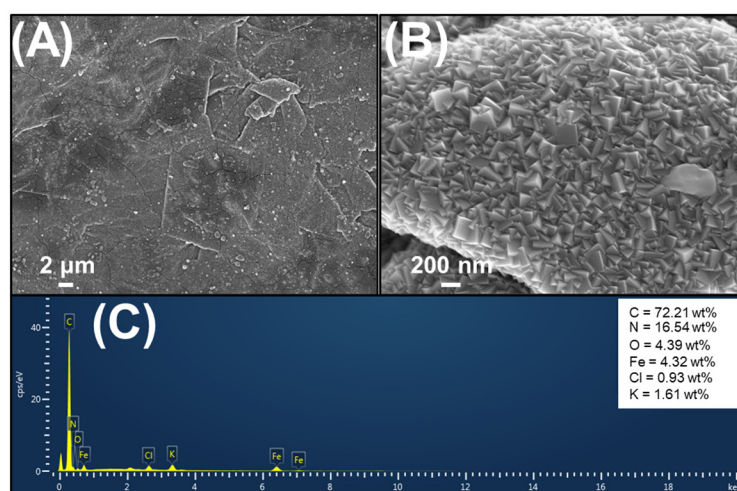

**Figure S2** SEM images at (A) low and (B) high magnitude of PB modified on iGPE. (C) EDX spectrum of PB modified on iGPE.

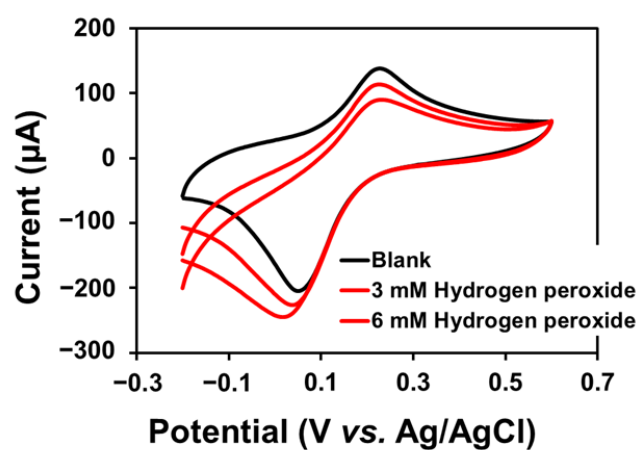

**Figure S3** Cyclic voltammograms of PB/iGPE in the absent and present hydrogen peroxide containing  $0.1 \text{ mol L}^{-1}$  PBS and  $0.1 \text{ mol L}^{-1}$  KCl.

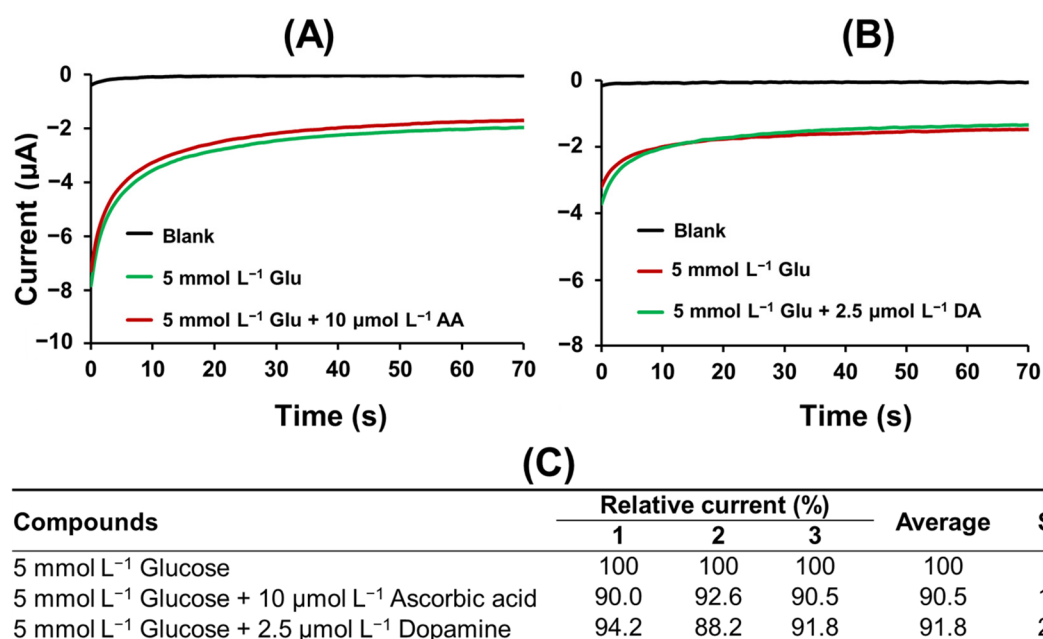

**Figure S4** Chronoamperograms of glucose in the presented of (A) ascorbic acid and (B) dopamine. (C) The relative current changed interpreted from chronoamperograms A and B.

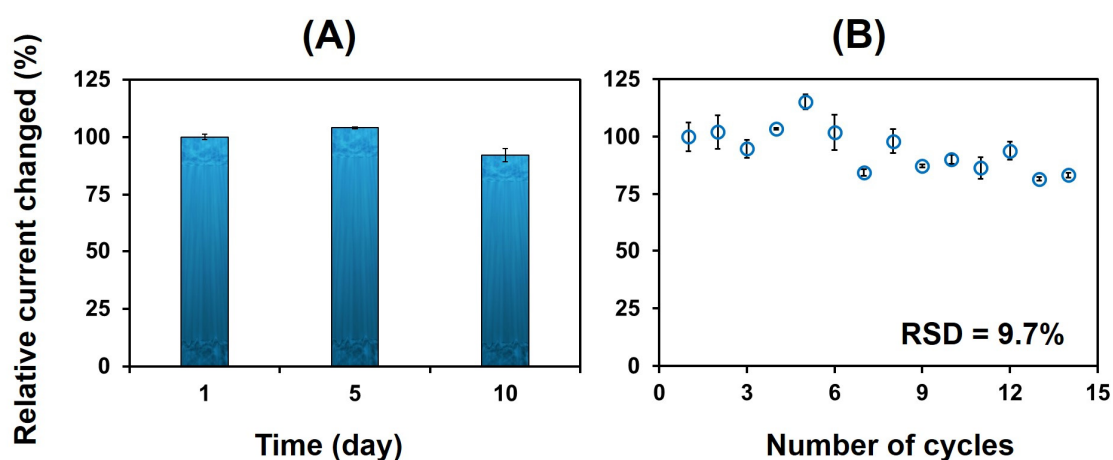

**Figure S5** (A) Stability of the glucose sensor for different days with current responses to 5.0 mmol L<sup>-1</sup> glucose (n=3), the current response at the first day was normalized as 100%. (B) Repeatability of the glucose sensor for several cycles, the response at the first time was defined as 100%.

**Table S1** The recovery values obtained from the spiked standard glucose in human serum sample

| Concentration of glucose (mmol L <sup>-1</sup> ) |       | Recovery (%) |
|--------------------------------------------------|-------|--------------|
| Spiked                                           | Found |              |
| 0                                                | 0.96  | -            |
| 1                                                | 2.05  | 108.8        |
| 2                                                | 2.72  | 88.2         |
| 3                                                | 3.62  | 88.7         |
